1 **VCF2CNA: A tool for efficiently detecting copy-number**  
2 **alterations in VCF genotype data**

3

4 Daniel K. Putnam, Xiaotu Ma, Stephen V. Rice, Yu Liu, Jinghui Zhang and Xiang Chen

5 Department of Computational Biology, St. Jude Children's Research Hospital, Memphis

6 TN, USA

7

8 Correspondence: [xiang.chen@stjude.org](mailto:xiang.chen@stjude.org)

9 **Abstract**

10 VCF2CNA is a web interface tool for copy-number alteration (CNA) analysis of VCF  
11 and other variant file formats. We applied it to 46 adult glioblastoma and 146 pediatric  
12 neuroblastoma samples sequenced by Illumina and Complete Genomics (CGI) platforms  
13 respectively. VCF2CNA was highly consistent with a state-of-the-art algorithm using  
14 raw sequencing data (mean F1-score=0.994) in high-quality glioblastoma samples and  
15 was robust to uneven coverage introduced by library artifacts. In the neuroblastoma set,  
16 VCF2CNA identified MYCN high-level amplifications in 31 of 32 clinically validated  
17 samples compared to 15 found by CGI's HMM-based CNA model. The findings suggest  
18 that VCF2CNA is an accurate, efficient and platform-independent tool for CNA analyses  
19 without accessing raw sequence data.

20

21 **Keywords:** VCF2CNA, Copy-number alteration (CNA), Cancer genomics

## 22 **Background**

23 Copy-number alterations (CNAs) are gains or losses in chromosomal segments that  
24 frequently occur in tumor cells. Recent surveys suggest that certain cancers are driven by  
25 CNAs [1]. In addition to directly affecting cancer genes (e.g., *MYCN* and *MDM2*  
26 amplifications and *RBI* and *CDKN2A* deletions), CNAs mediate oncogene  
27 overexpression through enhancer hijacking [2-5]. Several experimental methods are  
28 available to identify CNAs in tumor cells. Fluorescence in situ hybridization provides  
29 direct evidence of CNAs and is the gold standard for CNA detection in a targeted region  
30 [6]. Before the development of next-generation sequencing (NGS) technologies, array  
31 comparative genomic hybridization and high-resolution single nucleotide polymorphism  
32 (SNP) arrays permitted genome-wide evaluation of CNAs at 30-kb to 100-kb resolution.

33 The development of NGS, especially whole-genome sequencing (WGS) platforms,  
34 has revolutionized the detection of somatic mutations, including CNAs, in cancer  
35 samples. For example, Copy Number Segmentation by Regression Tree in Next  
36 Generation Sequencing (CONSERTING) [7] incorporates read-depth and structural-  
37 variation data from BAM files for accurate CNA detection in high-coverage WGS data.  
38 However, CONSERTING and other WGS-based CNA algorithms produce a fractured  
39 genome pattern (i.e., a hypersegmented CNA profile with an excessive number of  
40 intrachromosomal translocations) in samples with library construction artifacts [7], which  
41 poses a major challenge for precise CNA inference. Our extensive analysis indicated that  
42 although CNA and structural-variation detection was severely impaired by library  
43 artifacts, point-mutation detection was largely unaffected (data not shown), suggesting  
44 that a robust CNA tool can be developed from the variant information. Moreover,

45    CONSORTING and other WGS algorithms require direct access to aligned BAM files.  
46    Most algorithms further incur complicated installation steps, which create barriers for  
47    their widespread adoption. Advances in technology and declines in costs have made NGS  
48    a commodity for both basic research and clinical service. Therefore, a robust CNA  
49    analytical tool that is efficient, convenient, and robust to library artifacts is needed to  
50    manage the demands of NGS data analysis.

51        VCF2CNA (<http://vcf2cna.stjude.org>) is a web-based tool for CNA analysis. The  
52    preferred input to VCF2CNA is a Variant Call Format (VCF) file. VCF is a widely  
53    adopted format for genetic variation data exchange, and VCF files are quite small  
54    compared to WGS BAM files. Each variant in a typical VCF file contains its  
55    chromosome position, reference/alternative alleles, and corresponding allele counts,  
56    which are used by VCF2CNA to identify copy-number alterations. This tool also accepts  
57    input in the Mutation Annotation Format (MAF) and the variant file format produced by  
58    the Bambino program [8].

59

## 60    **Results**

61    VCF2CNA has a simple interface (Fig. 1a). The sole input is a VCF file (or a file in one  
62    of the other supported variant file formats) from a paired tumor–normal WGS analysis,  
63    which is uploaded via the interface to a web server where the application runs. The  
64    results are returned to a user-provided email address. VCF2CNA consists of two main  
65    modules: 1) SNP information retrieval and processing from the input data and 2)  
66    recursive partitioning–based segmentation using SNP allele counts (Fig. 1b). Actual

67 running time for a typical sample is approximately 30 to 60 minutes, depending on the  
68 complexity of the genome.

69 To evaluate the utility of VCF2CNA, we ran it on 192 tumor–normal WGS data sets.  
70 These sequences comprised 46 adult glioblastomas (GBMs) from The Cancer Genome  
71 Atlas (TCGA-GBM) dataset [9], sequenced by Illumina technology, and 146 pediatric  
72 neuroblastomas (NBLs) from the Therapeutically Applicable Research to Generate  
73 Effective Treatments (TARGET-NBL) dataset (unpublished), sequenced by Complete  
74 Genomics, Inc. (CGI) technology. On average, VCF2CNA used approximately 2.8  
75 million high-quality SNPs per sample (median 2,811,245; range, 2,029,467–3,519,454 in  
76 TARGET-NBL data) to derive CNA profiles.

77

#### 78 **CNA analysis of TCGA-GBM data**

79 The adult TCGA-GBM data downloaded from dbGaP (accession number:  
80 phs000178.v8.p7) included 46 samples. We first evaluated VCF2CNA’s resistance to  
81 library construction artifacts by using 24 samples from this set, which were previously  
82 identified as having a fractured genome pattern by CONSERTING and other CNA  
83 algorithms [7]. Indeed, VCF2CNA produced CNA profiles that are globally consistent  
84 with those of SNP array–derived CNA profiles (downloaded from TCGA, Additional file  
85 1.1 and 1.2) and more robust to noise than those produced by CONSERTING.  
86 Specifically, VCF2CNA yielded a mean 59.4-fold reduction in the number of predicted  
87 segments than did CONSERTING (median, 46.2; range, 16.2–285.7;  $p = 3.0 \times 10^{-6}$  by  
88 Wilcoxon signed-rank test, Fig. 2a and Additional file 1).

89 We used an  $F_1$  scoring metric [10] to measure the consistency between the CNA  
90 profiles derived from VCF2CNA and CONSERTING in the remaining 22 high-quality

91 sample pairs (Fig. 2b and Additional file 2). These programs identified approximately  
92 700 Mb of the CNA regions in each sample (range, 92–2299 Mb) with high consistency  
93 (mean  $F_1$  score, 0.9941; range, 0.9699–0.9995) (Table 1).

94 We evaluated the segmental overlap between the CONSERTING outputs and the  
95 VCF2CNA outputs for each sample. A CNA segment detected by CONSERTING was  
96 classified as corroborated if 90% of the bases in the segment received the same type of  
97 CNA call from VCF2CNA (Table 2). The comparison shows that VCF2CNA faithfully  
98 recapitulated medium to large CNA segments ( $\geq 100$  kb) (Fig. 3a), whereas  
99 CONSERTING had greater power for identifying focal ( $< 100$  kb) low-amplitude  
100 (absolute  $\log_2$  ratio change  $< 1.0$ ) CNAs ( $p = 1.306 \times 10^{-5}$  by Wilcoxon signed-rank  
101 test, Fig. 3b). Furthermore, the segmental-based analysis revealed that the detection  
102 power was less affected in focal CNAs with large amplitudes ( $\log_2$  ratio  $\geq 3.0$ ) (Fig.  
103 3c).

104 To further test whether VCF2CNA accurately captures the CNA patterns in samples  
105 with library artifacts, we applied the cghMCR algorithm [11]. This algorithm identifies  
106 genomic regions that exhibit common gains and losses across all 46 samples from either  
107 VCF2CNA profiles or SNP array-derived CNA profiles (downloaded from TCGA).  
108 Although the signal from VCF2CNA contained less noise than did the signal from the  
109 SNP array in most samples (Additional file 1), both profiles reveal common recurrently  
110 amplified and/or lost regions (Fig. 4). These changes included chromosome-level changes  
111 (i.e., chr7 amplifications and loss of chr10) and segmental CNAs (i.e., focal deletion of  
112 the *CDKN2A/B* locus on chr9p) [12]. Moreover, VCF2CNA identified recurrent losses in  
113 *ERBB4* on chr2q and *GRIK2* on chr6q that were absent in the SNP array profiles. *ERBB4*

114 encodes a transmembrane receptor kinase that is essential for neuronal development [13].  
115 It is frequently mutated in patients with non-small cell lung cancer [14], and silencing of  
116 *ERBB4* through DNA hypermethylation is associated with poor prognosis in primary  
117 breast tumors [15]. Similarly, *GRIK2* is a candidate tumor suppressor gene that is  
118 frequently deleted in acute lymphocytic leukemia [16] and silenced by DNA  
119 hypermethylation in gastric cancer [17].

120 Amplifications such as double minute chromosomes and homogeneously staining  
121 regions represent a common mechanism of oncogene overexpression in tumors [18].  
122 Among the 46 TCGA-GBM samples analyzed, VCF2CNA identified double minute  
123 chromosomes in 34 samples affecting the *EGFR* [19], *MDM2* [20], *MDM4* [21],  
124 *PDGFRA* [22], *HGF* [23], *GLI1* [24], *CDK4* [25], and *CDK6* [26] genes (Fig. 5 and  
125 Additional file 3). These events consisted of high-level amplifications in 21 samples with  
126 potential fractured genome patterns (Additional file 3a) and 13 previously reported  
127 samples (Additional file 3b) [7, 27].

128

### 129 **CNA analysis of TARGET-NBL data**

130 We applied VCF2CNA to the TARGET-NBL dataset downloaded from dbGap (assession  
131 number: phs000467). This dataset consists of 146 tumors with matched normal WGS  
132 samples, sequenced with CGI technology. Because the ligation-based CGI technology  
133 has notable differences in the detection of single nucleotide variants (SNVs) and  
134 insertions/deletions (indels) compared to Illumina systems [28], this dataset provided an  
135 opportunity to evaluate VCF2CNA's robustness using different sequencing platforms.

136 We used VCF2CNA to perform cghMCR analysis with CNA profiles and observed a  
137 genome pattern similar to that reported for SNP array platforms (Fig. 6a) [29]. In addition

138 to loss of large regions on chr1p, 3p, and 11q and a broad gain of chr17q, VCF2CNA  
139 found frequent focal amplifications of *MYCN* in NBL tumors and several potential  
140 cancer-related CNAs, including high-level amplifications of *CDK4* (1 tumor), and *ALK*  
141 (2 tumors) (Fig. 6b).

142 High-level amplification of *MYCN* is a known oncogenic driver found in ~25% of  
143 pediatric patients with NBL, and is associated with aggressive tumors and poor prognosis  
144 [30]. A subset of 32 tumors in the TARGET-NBL cohort contains clinically validated  
145 amplifications of *MYCN*. Although the CGI's hidden Markov CNA model (unpublished)  
146 reported *MYCN* amplifications in 15 of these 32 tumors, VCF2CNA successfully  
147 identified high-level amplifications in 31 tumors. In the clinically validated *MYCN*-  
148 amplified sample that went undetected by VCF2CNA, a follow-up review revealed that  
149 tumor heterogeneity and sampling bias most likely contributed to the discrepancy.  
150 Moreover, VCF2CNA predicted two additional *MYCN* amplification events among the  
151 remaining tumor samples, indicating that VCF2CNA can identify clinically relevant  
152 CNAs that were undetected by traditional methods of CNA detection. The high-level  
153 concordance with clinically validated data provides a strong indication that VCF2CNA is  
154 applicable to multiple tumor types collected from different sequencing platforms.

155

## 156 **Discussion and conclusions**

157 We developed VCF2CNA for the systematic and robust detection of CNAs from VCF  
158 and other genotyping variant call formats. Analysis of 192 paired tumor-normal WGS  
159 samples sequenced on multiple platforms demonstrates that VCF2CNA is robust to  
160 library construction artifacts and captures medium to large CNA segments with high



161 accuracy. Because VCF2CNA is robust to library artifacts and is highly accurate, it  
162 identified recurrent losses in potential tumor suppressors that were undetectable by  
163 alternative approaches.

164 VCF2CNA was designed with SNPs that were (on average) thousands of base pairs  
165 apart, which limits support for identifying focal copy-number changes. Therefore, state-  
166 of-the-art CNA algorithms have superior detection power for focal low-amplitude CNAs  
167 in high-quality, high-coverage WGS data.

168 In conclusion, VCF2CNA is a web-based tool that is capable of accurate and efficient  
169 detection of CNAs from variants called from high-coverage WGS data sequenced on  
170 various platforms.

171

## 172 **Methods**

### 173 **Server availability**

174 VCF2CNA is available at <https://vcf2cna.stjude.org>.

175

### 176 **Parameter definitions**

177 The Specify Diploid Chromosome parameter normalizes results by the specified  
178 chromosome. The Median Normal Coverage parameter permits input of the median  
179 coverage value of SNPs from normal samples. The Minimum Scale Factor (autosomes)  
180 parameter is multiplied by the median to compute the minimum coverage value. The  
181 Maximum Scale Factor (autosomes) parameter is multiplied by the median to compute  
182 the maximum coverage value. The Minimum X Scale Factor is the minimum scale factor  
183 for chromosome X. The Maximum X Scale Factor is the maximum scale factor for  
184 chromosome X. The Sample Order (VCF format only) parameter defines the ordering of

185 tumor and normal samples. VCF inputs must include tumor and normal data after the  
186 FORMAT field. Selecting the Tumor/Normal button assigns the tumor data to the first  
187 field after FORMAT and normal data to the second field. The Normal/Tumor radio  
188 button specifies the reverse order.

189

### 190 **Input data for VCF2CNA**

191 The input for VCF2CNA analysis includes VCF, MAF, and the variant file format  
192 produced by the Bambino program. A fixed window size of 100 bp is used to obtain the  
193 mean coverage for each window. Windows with no variants are ignored. The mean read  
194 depth per window can be normalized to a set of reference diploid chromosomal regions  
195 by using the same criteria as CONSERTING or specified via the Specify Diploid  
196 Chromosome parameter.

197

### 198 **Run-time analysis**

199 Single VCF files must be converted to a paired tumor/normal file before uploading.  
200 Alternatively, VCF2CNA accepts MAF and Bambino variant file formats. After  
201 uploading files to the server, the median running time was 23 minutes on an intel Xeon  
202 E5-2680 processor at 2.70 Ghz with 64 GB RAM. Server processing occurs in two  
203 principal steps: 1) preprocessing and SNP information extraction from input files and 2)  
204 running the recursive partitioning segmentation.

205

### 206 **F<sub>1</sub> scoring metric and segmental corroboration**

207 A genomic position was assigned a corroborated CNA call if its computed CNA type  
208 (gain or loss) by VCF2CNA matched the call computed by CONSERTING. A CNA

209 segment in the CONCERTING profile was corroborated in the VCF2CNA profile if  
210  $\geq 90\%$  of the segment positions were corroborated. The  $F_1$  score is given by  $F_1 =$   
211  $\frac{2(\textit{precision})(\textit{recall})}{\textit{precision}+\textit{recall}}$ . It was used to summarize the accuracy of VCF2CNA, compared with  
212 that of CONCERTING.

213

## 214 **VCF2CNA web server pipeline**

### 215 *Step1 (snvcounts)*

216 Single nucleotide variant frequencies are computed from the input file. For each  
217 chromosome and position, the values computed are TumorMutant, TumorTotal,  
218 NormalMutant, and NormalTotal. Additionally, the mean normal coverage is computed.

219

### 220 *Step2 (consprep)*

221 The consprep program reads the SNV count data and incorporates a list of good / bad  
222 SNVs. It also reads a file specifying the number of 100-bp windows in each chromosome.  
223 If the total number of reads from the normal sample falls outside of the ranges specified  
224 by the options (median, minfactor, maxfactor, xminfactor, or xmaxfactor), the input  
225 position is ignored by the consprep step in the pipeline. The  $-xminfactor$  and  $-$   
226  $xmaxfactor$  settings apply to positions in chrX; the  $-minfactor$  and  $-maxfactor$  settings  
227 apply to all other chromosomes. The minimum coverage is the median multiplied by the  
228  $-minfactor$ , and the maximum coverage is the median multiplied by the  $-maxfactor$ .

### 229 *Application*

230 To run VCF2CNA, users should navigate to the application home page and click “run  
231 application.” The application runs on Google Chrome, Safari, Mozilla Firefox, and

232 Microsoft Internet Explorer 11. Users must provide a valid email in the email address text  
233 field. Users will select whether results will be sent to the provided email address as either  
234 an email attachment or a link to the result files stored on the server. Results will be stored  
235 on the server for 14 days. Default run parameters may be modified depending on job  
236 specifications. Users should select the input file and click the “upload/run” button. The  
237 browser window should not be killed during the file upload. Once the file has been  
238 successfully uploaded, a notification will be displayed in the browser window and the  
239 user may discard the window.

240

#### 241 **Rationale for not using the reciprocal-overlap rule**

242 To compare CNA calls from different algorithms, the reciprocal 50% overlap criterion  
243 [28] is commonly used. This rule is not suitable when two CNA calls are derived from  
244 platforms with different powers in detecting focal CNAs. A considerably larger average  
245 distance occurred between adjacent probes. VCF2CNA-derived CNA calls have an  
246 inherently lower resolution than does CONSERING. When a focal CNA identified  
247 through CONSERING occurs on top of a large CNA fragment, CONSERING breaks  
248 the region into multiple segments. Although the CNA fragments in the region are largely  
249 corroborated between the two CNA callers, potentially none of these fragments satisfied  
250 the rule of reciprocal 50% overlap (Additional file 4).

#### 251 **Declarations**

##### 252 **Ethics approval and consent to participate**

253 Not applicable.

##### 254 **Consent for publication**

255 Not applicable.

256 **Availability of data and material**

257 Both datasets were downloaded from dbGaP (<https://dbgap.ncbi.nlm.nih.gov>). The  
258 TCGA-GBM data were downloaded from dbGaP (accession number: phs000178.v8.p7)  
259 and included 46 samples. The TARGET-NBL data were downloaded from dbGap  
260 (accession number: phs000467) and included 146 samples. VCF2CNA is available at  
261 <https://vcf2cna.stjude.org>.

262 **Competing interests**

263 The authors declare that they have no competing interests.

264 **Funding**

265 This study was supported by ALSAC.

266 **Authors' contributions**

267 JZ and XC conceived the concept. DP, XM, and XC designed the VCF2CNA algorithm.  
268 DP, XM, SR, and XC implemented the algorithm. DP, XM, YL, and XC performed the  
269 analysis. DP and XC wrote the manuscript.

270 **Acknowledgements**

271 We thank Dr. Nisha Badders for editing the manuscript and Soubhadra Datta for server  
272 support.

273

## 274 References

- 275 1. Ciriello G, Miller ML, Aksoy BA, Senbabaoglu Y, Schultz N, Sander C: **Emerging landscape**  
276 **of oncogenic signatures across human cancers.** *Nat Genet* 2013, **45**:1127-1133.
- 277 2. Groschel S, Sanders MA, Hoogenboezem R, de Wit E, Bouwman BA, Erpelinck C, van der  
278 Velden VH, Havermans M, Avellino R, van Lom K, et al: **A single oncogenic enhancer**  
279 **rearrangement causes concomitant EVI1 and GATA2 deregulation in leukemia.** *Cell*  
280 2014, **157**:369-381.
- 281 3. Hnisz D, Weintraub AS, Day DS, Valton AL, Bak RO, Li CH, Goldmann J, Lajoie BR, Fan ZP,  
282 Sigova AA, et al: **Activation of proto-oncogenes by disruption of chromosome**  
283 **neighborhoods.** *Science* 2016, **351**:1454-1458.
- 284 4. Northcott PA, Lee C, Zichner T, Stutz AM, Erkek S, Kawauchi D, Shih DJ, Hovestadt V,  
285 Zapatka M, Sturm D, et al: **Enhancer hijacking activates GF11 family oncogenes in**  
286 **medulloblastoma.** *Nature* 2014, **511**:428-434.
- 287 5. Peifer M, Hertwig F, Roels F, Dreidax D, Gartlgruber M, Menon R, Kramer A, Roncaioli JL,  
288 Sand F, Heuckmann JM, et al: **Telomerase activation by genomic rearrangements in**  
289 **high-risk neuroblastoma.** *Nature* 2015, **526**:700-704.
- 290 6. Hu L, Ru K, Zhang L, Huang Y, Zhu X, Liu H, Zetterberg A, Cheng T, Miao W: **Fluorescence**  
291 **in situ hybridization (FISH): an increasingly demanded tool for biomarker research and**  
292 **personalized medicine.** *Biomark Res* 2014, **2**:3.
- 293 7. Chen X, Gupta P, Wang J, Nakitandwe J, Roberts K, Dalton JD, Parker M, Patel S,  
294 Holmfeldt L, Payne D, et al: **CONSERGING: integrating copy-number analysis with**  
295 **structural-variation detection.** *Nat Methods* 2015, **12**:527-530.
- 296 8. Edmonson MN, Zhang J, Yan C, Finney RP, Meerzaman DM, Buetow KH: **Bambino: a**  
297 **variant detector and alignment viewer for next-generation sequencing data in the**  
298 **SAM/BAM format.** *Bioinformatics* 2011, **27**:865-866.
- 299 9. Brennan CW, Verhaak RG, McKenna A, Campos B, Noushmehr H, Salama SR, Zheng S,  
300 Chakravarty D, Sanborn JZ, Berman SH, et al: **The somatic genomic landscape of**  
301 **glioblastoma.** *Cell* 2013, **155**:462-477.
- 302 10. Van Rijsbergen C: **Foundation of Evaluation.** *Journal of Documentation* 1974, **30**:365-  
303 373.
- 304 11. Aguirre AJ, Brennan C, Bailey G, Sinha R, Feng B, Leo C, Zhang Y, Zhang J, Gans JD,  
305 Bardeesy N, et al: **High-resolution characterization of the pancreatic adenocarcinoma**  
306 **genome.** *Proc Natl Acad Sci U S A* 2004, **101**:9067-9072.
- 307 12. Burton EC, Lamborn KR, Feuerstein BG, Prados M, Scott J, Forsyth P, Passe S, Jenkins RB,  
308 Aldape KD: **Genetic aberrations defined by comparative genomic hybridization**  
309 **distinguish long-term from typical survivors of glioblastoma.** *Cancer Res* 2002,  
310 **62**:6205-6210.
- 311 13. Anton ES, Ghashghaei HT, Weber JL, McCann C, Fischer TM, Cheung ID, Gassmann M,  
312 Messing A, Klein R, Schwab MH, et al: **Receptor tyrosine kinase ErbB4 modulates**  
313 **neuroblast migration and placement in the adult forebrain.** *Nat Neurosci* 2004, **7**:1319-  
314 1328.
- 315 14. Kurppa KJ, Denessiouk K, Johnson MS, Elenius K: **Activating ERBB4 mutations in non-**  
316 **small cell lung cancer.** *Oncogene* 2016, **35**:1283-1291.
- 317 15. Das PM, Thor AD, Edgerton SM, Barry SK, Chen DF, Jones FE: **Reactivation of**  
318 **epigenetically silenced HER4/ERBB4 results in apoptosis of breast tumor cells.**  
319 *Oncogene* 2010, **29**:5214-5219.

- 320 16. Sinclair PB, Sorour A, Martineau M, Harrison CJ, Mitchell WA, O'Neill E, Foroni L: **A**  
321 **fluorescence in situ hybridization map of 6q deletions in acute lymphocytic leukemia:**  
322 **identification and analysis of a candidate tumor suppressor gene.** *Cancer Res* 2004,  
323 **64**:4089-4098.
- 324 17. Wu CS, Lu YJ, Li HP, Hsueh C, Lu CY, Leu YW, Liu HP, Lin KH, Hui-Ming Huang T, Chang YS:  
325 **Glutamate receptor, ionotropic, kainate 2 silencing by DNA hypermethylation**  
326 **possesses tumor suppressor function in gastric cancer.** *Int J Cancer* 2010, **126**:2542-  
327 2552.
- 328 18. Albertson DG: **Gene amplification in cancer.** *Trends Genet* 2006, **22**:447-455.
- 329 19. Huang PH, Xu AM, White FM: **Oncogenic EGFR signaling networks in glioma.** *Sci Signal*  
330 2009, **2**:re6.
- 331 20. Biernat W, Kleihues P, Yonekawa Y, Ohgaki H: **Amplification and overexpression of**  
332 **MDM2 in primary (de novo) glioblastomas.** *J Neuropathol Exp Neurol* 1997, **56**:180-185.
- 333 21. Riemenschneider MJ, Buschges R, Wolter M, Reifenberger J, Bostrom J, Kraus JA,  
334 Schlegel U, Reifenberger G: **Amplification and overexpression of the MDM4 (MDMX)**  
335 **gene from 1q32 in a subset of malignant gliomas without TP53 mutation or MDM2**  
336 **amplification.** *Cancer Res* 1999, **59**:6091-6096.
- 337 22. Phillips JJ, Aranda D, Ellison DW, Judkins AR, Croul SE, Brat DJ, Ligon KL, Horbinski C,  
338 Venneti S, Zadeh G, et al: **PDGFRA amplification is common in pediatric and adult high-**  
339 **grade astrocytomas and identifies a poor prognostic group in IDH1 mutant**  
340 **glioblastoma.** *Brain Pathol* 2013, **23**:565-573.
- 341 23. Zhao Y, Sun Y, Zhang H, Liu X, Du W, Li Y, Zhang J, Chen L, Jiang C: **HGF/MET signaling**  
342 **promotes glioma growth via up-regulation of Cox-2 expression and PGE2 production.**  
343 *Int J Clin Exp Pathol* 2015, **8**:3719-3726.
- 344 24. Kanu OO, Hughes B, Di C, Lin N, Fu J, Bigner DD, Yan H, Adamson C: **Glioblastoma**  
345 **Multiforme Oncogenomics and Signaling Pathways.** *Clin Med Oncol* 2009, **3**:39-52.
- 346 25. Reifenberger G, Ichimura K, Reifenberger J, Elkahoul AG, Meltzer PS, Collins VP:  
347 **Refined mapping of 12q13-q15 amplicons in human malignant gliomas suggests**  
348 **CDK4/SAS and MDM2 as independent amplification targets.** *Cancer Res* 1996, **56**:5141-  
349 5145.
- 350 26. Costello JF, Plass C, Arap W, Chapman VM, Held WA, Berger MS, Su Huang HJ, Cavenee  
351 WK: **Cyclin-dependent kinase 6 (CDK6) amplification in human gliomas identified using**  
352 **two-dimensional separation of genomic DNA.** *Cancer Res* 1997, **57**:1250-1254.
- 353 27. Sanborn JZ, Salama SR, Grifford M, Brennan CW, Mikkelsen T, Jhanwar S, Katzman S,  
354 Chin L, Haussler D: **Double minute chromosomes in glioblastoma multiforme are**  
355 **revealed by precise reconstruction of oncogenic amplicons.** *Cancer Res* 2013, **73**:6036-  
356 6045.
- 357 28. Mills RE, Walter K, Stewart C, Handsaker RE, Chen K, Alkan C, Abyzov A, Yoon SC, Ye K,  
358 Cheetham RK, et al: **Mapping copy number variation by population-scale genome**  
359 **sequencing.** *Nature* 2011, **470**:59-65.
- 360 29. George RE, Attiyeh EF, Li S, Moreau LA, Neuberg D, Li C, Fox EA, Meyerson M, Diller L,  
361 Fortina P, et al: **Genome-wide analysis of neuroblastomas using high-density single**  
362 **nucleotide polymorphism arrays.** *PLoS One* 2007, **2**:e255.
- 363 30. Huang M, Weiss WA: **Neuroblastoma and MYCN.** *Cold Spring Harb Perspect Med* 2013,  
364 **3**:a014415.

365  
366

367 **Table 1**  $F_1$  score between CONsertING and VCF2CNA and autosomal CNAs per  
368 sample in 22 TCGA samples

| Sample                | $F_1$ score | Autosomal CNAs per sample (Mb) |
|-----------------------|-------------|--------------------------------|
| SJHGG011906_D1_G1_N13 | 0.9699      | 567.70                         |
| SJHGG010485_D1_G1     | 0.9840      | 789.90                         |
| SJHGG011903_D1_G1     | 0.9862      | 459.20                         |
| SJHGG010643_D1_G1_N5  | 0.9870      | 1471.67                        |
| SJHGG010641_D1_G1     | 0.9884      | 285.89                         |
| SJHGG010600_R1_G1     | 0.9892      | 485.85                         |
| SJHGG010484_R1_G1_N2  | 0.9949      | 2299.48                        |
| SJHGG010560_R1_G1     | 0.9955      | 756.08                         |
| SJHGG010624_R1_G1     | 0.9956      | 1259.68                        |
| SJHGG010600_D1_G1     | 0.9968      | 389.60                         |
| SJHGG010485_R1_G1     | 0.9970      | 92.16                          |
| SJHGG011904_D1_G1     | 0.9979      | 696.48                         |
| SJHGG010540_D2_G1     | 0.9981      | 660.74                         |
| SJHGG010484_D1_G1     | 0.9983      | 841.72                         |
| SJHGG010509_D1_G1     | 0.9983      | 586.18                         |
| SJHGG010560_D1_G1     | 0.9984      | 551.73                         |
| SJHGG010577_D1_G1     | 0.9984      | 831.67                         |
| SJHGG010509_R1_G1     | 0.9988      | 562.44                         |
| SJHGG010572_R1_G1     | 0.9992      | 427.91                         |
| SJHGG010572_D1_G1     | 0.9994      | 456.27                         |
| SJHGG010624_D1_G1     | 0.9995      | 454.09                         |
| SJHGG010540_R1_G1     | 0.9995      | 463.89                         |

369



370 **Table 2** Counts of corroborated and uncorroborated segments by segment length

| Sample                | Matched segment length ( $\log_{10}$ ) |       |       |       |     | Unmatched segment length ( $\log_{10}$ ) |       |       |       |    | Match percentage |               |
|-----------------------|----------------------------------------|-------|-------|-------|-----|------------------------------------------|-------|-------|-------|----|------------------|---------------|
|                       | <3                                     | [3,4) | [4,5) | [5,6) | >6  | <3                                       | [3,4) | [4,5) | [5,6) | >6 | <100 kb          | $\geq$ 100 kb |
| SJHGG010484_D1_G1     | 0                                      | 4     | 45    | 24    | 54  | 2                                        | 9     | 31    | 3     | 0  | 0.5385           | 0.9630        |
| SJHGG010484_R1_G1_N2  | 4                                      | 8     | 23    | 21    | 90  | 8                                        | 7     | 3     | 1     | 0  | 0.6604           | 0.9911        |
| SJHGG010485_D1_G1     | 8                                      | 5     | 20    | 20    | 40  | 20                                       | 25    | 16    | 4     | 1  | 0.3511           | 0.9231        |
| SJHGG010485_R1_G1     | 0                                      | 0     | 0     | 0     | 2   | 9                                        | 1     | 3     | 1     | 0  | 0.0000           | 0.6667        |
| SJHGG010509_D1_G1     | 3                                      | 0     | 9     | 15    | 24  | 3                                        | 0     | 5     | 0     | 0  | 0.6000           | 1.0000        |
| SJHGG010509_R1_G1     | 5                                      | 0     | 11    | 11    | 24  | 8                                        | 1     | 4     | 1     | 0  | 0.5517           | 0.9722        |
| SJHGG010540_D2_G1     | 5                                      | 11    | 46    | 25    | 28  | 4                                        | 10    | 5     | 0     | 0  | 0.7654           | 1.0000        |
| SJHGG010540_R1_G1     | 4                                      | 9     | 31    | 32    | 22  | 3                                        | 11    | 9     | 0     | 0  | 0.6567           | 1.0000        |
| SJHGG010560_D1_G1     | 9                                      | 30    | 59    | 32    | 20  | 24                                       | 39    | 20    | 0     | 0  | 0.5414           | 1.0000        |
| SJHGG010560_R1_G1     | 2                                      | 0     | 5     | 17    | 26  | 24                                       | 25    | 15    | 3     | 1  | 0.0986           | 0.9149        |
| SJHGG010572_D1_G1     | 2                                      | 5     | 23    | 27    | 26  | 38                                       | 12    | 7     | 0     | 0  | 0.3448           | 1.0000        |
| SJHGG010572_R1_G1     | 2                                      | 2     | 4     | 24    | 18  | 30                                       | 18    | 8     | 1     | 0  | 0.1250           | 0.9767        |
| SJHGG010577_D1_G1     | 7                                      | 4     | 24    | 36    | 37  | 15                                       | 12    | 9     | 2     | 0  | 0.4930           | 0.9733        |
| SJHGG010600_D1_G1     | 29                                     | 26    | 45    | 79    | 32  | 40                                       | 26    | 17    | 1     | 0  | 0.5464           | 0.9911        |
| SJHGG010600_R1_G1     | 18                                     | 26    | 50    | 65    | 27  | 51                                       | 28    | 11    | 2     | 0  | 0.5109           | 0.9787        |
| SJHGG010624_D1_G1     | 13                                     | 13    | 114   | 53    | 82  | 32                                       | 7     | 2     | 0     | 0  | 0.7735           | 1.0000        |
| SJHGG010624_R1_G1     | 9                                      | 8     | 143   | 110   | 202 | 22                                       | 4     | 17    | 1     | 0  | 0.7882           | 0.9968        |
| SJHGG010641_D1_G1     | 27                                     | 50    | 99    | 62    | 39  | 19                                       | 325   | 175   | 3     | 0  | 0.2532           | 0.9712        |
| SJHGG010643_D1_G1_N5  | 5                                      | 13    | 22    | 33    | 30  | 24                                       | 24    | 11    | 15    | 2  | 0.4040           | 0.7875        |
| SJHGG011903_D1_G1     | 1                                      | 0     | 4     | 39    | 13  | 2                                        | 5     | 0     | 0     | 1  | 0.4167           | 0.9811        |
| SJHGG011904_D1_G1     | 1                                      | 2     | 4     | 14    | 23  | 1                                        | 1     | 5     | 1     | 0  | 0.5000           | 0.9737        |
| SJHGG011906_D1_G1_N13 | 3                                      | 14    | 42    | 26    | 44  | 10                                       | 19    | 27    | 3     | 0  | 0.5130           | 0.9589        |
| SJHGG010484_D1_G1     | 0                                      | 4     | 45    | 24    | 54  | 2                                        | 9     | 31    | 3     | 0  | 0.5385           | 0.9630        |

371

372 **Figure legends**

373 **Fig. 1** Overview of the VCF2CNA process. **a** User interface with parameters. **b** Server  
374 side pipeline. A parallelogram depicts input or output files, a rectangle depicts an  
375 analytical process, and a diamond depicts the condition for a follow-up process.

376

377 **Fig. 2** A Circos plot that displays CNAs found by CONSERTING (outer ring), VCF2CNA  
378 (middle ring), and SNP array (inner ring) for **a** TCGA-GBM fractured sample 41-5651-  
379 01A and **b** TCGA-GBM unfractured sample 06-0125-01A. Alternating gray and black  
380 chromosomes are used for contrast. Yellow regions depict sequencing gaps, whereas  
381 red regions depict centromere location. Blue segments depict copy-number loss, and red  
382 segments indicate copy-number gain.

383

384 **Fig. 3** Heatmap of segment length by CNA intensity. Color scale depicts density of  
385 segment found at a given segment and CNA size. **a** Corroborated samples, **b**  
386 uncorroborated samples, and **c** three-dimensional plots of segment length, CNA  
387 intensity, and percent agreement with CONSERTING segments are shown.

388

389 **Fig. 4** A chgMCR plot of 46 TCGA-GBM samples. **a** SNP array data and **b** VCF2CNA  
390 data are shown.

391

392 **Fig. 5** A Circos plot of VCF2CNA (outer ring) and CONSERTING (inner ring), depicting  
393 high-amplitude focal CNA segments in TCGA-GBM sample 06-0152-01A. Included in  
394 these segments are the known cancer genes *EGFR*, *CDK4*, and *MDM2*.

395

396 **Fig. 6** Analysis of the TARGET-NBL dataset, consisting of 146 tumors. **a** A chgMCR plot  
397 in which green depicts regions of copy-number gain and red depicts regions of copy-

398 number loss. **b** A Circos plot showing a focal gain on chromosome 2 for *MYCN* and  
399 *ALK5* for sample PARETE-01A-01D.

400

#### 401 **Additional files**

402 **Additional file 1:** Circos plot of CONSERTING (outer ring), VCF2CNA (middle ring),  
403 and SNP array (inner ring) for 24 TCGA-GBM samples with a fractured gene signature.

404 **Additional file 2:** Circos plot of CONSERTING (outer ring) and VCF2CNA (inner ring)  
405 for all 22 TCGA-GBM samples without a fractured gene signature.

406 **Additional file 3:** A Circos plot of VCF2CNA (outer ring) and CONSERTING (inner ring),  
407 depicting high-amplitude focal CNA segments in 34 TCGA-GBM samples. **a** 21 fractured  
408 genome TCGA-GBM samples. **b** 13 previously reported samples.

409 **Additional file 4:** Segmental Overlap. **a** A hypothetical large segment identified by  
410 CONSERTING (red). **b** Subsequent focal segments identified by CONSERTING (blue).  
411 The original segment was split into five subsegments. None of the subsegments in **b** met  
412 the reciprocal 50% segment overlap criteria with the original segment.

A

**VCF2CNA APP**

Email address

Select Delivery Method

Attachment  Link

Modify Default Parameters ▾

|                            |      |
|----------------------------|------|
| Specify Diploid Chromosome | NA   |
| Median Normal Coverage     | NA   |
| Minimum Scale Factor       | 0.50 |
| Maximum Scale Factor       | 1.50 |
| Minimum X Scale Factor     | 0.25 |
| Maximum X Scale Factor     | 1.50 |

Sample Order [VCF Format Only]

Tumor/Normal  Normal/Tumor

B

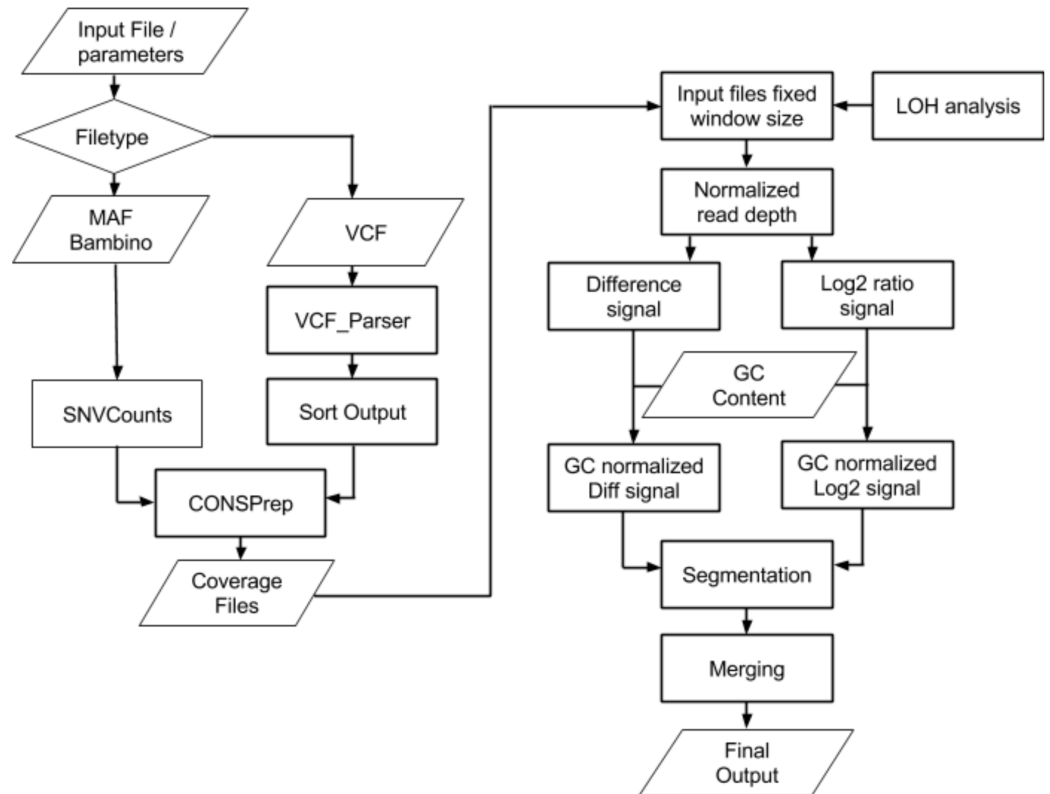

**A**

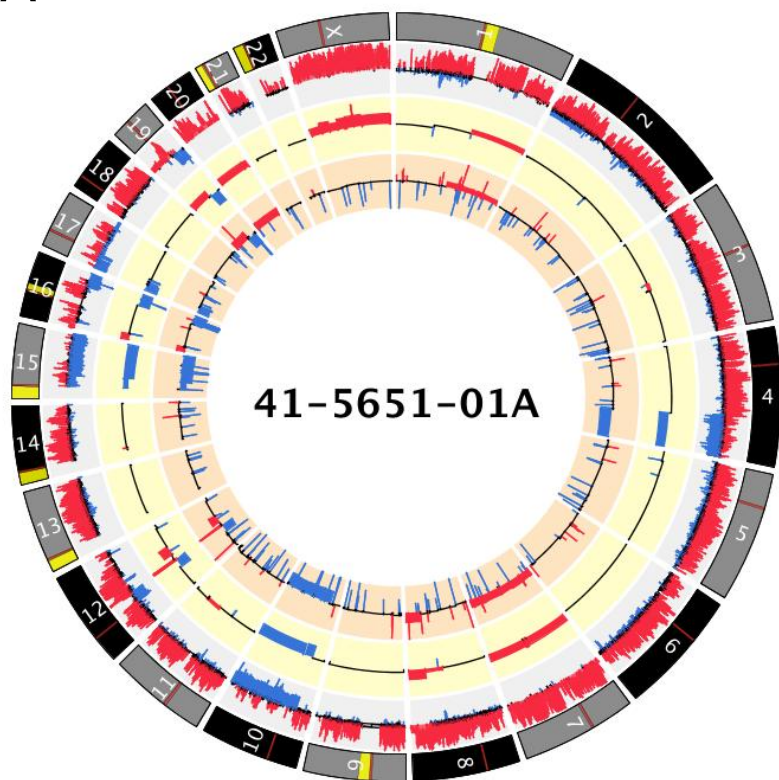

**B**

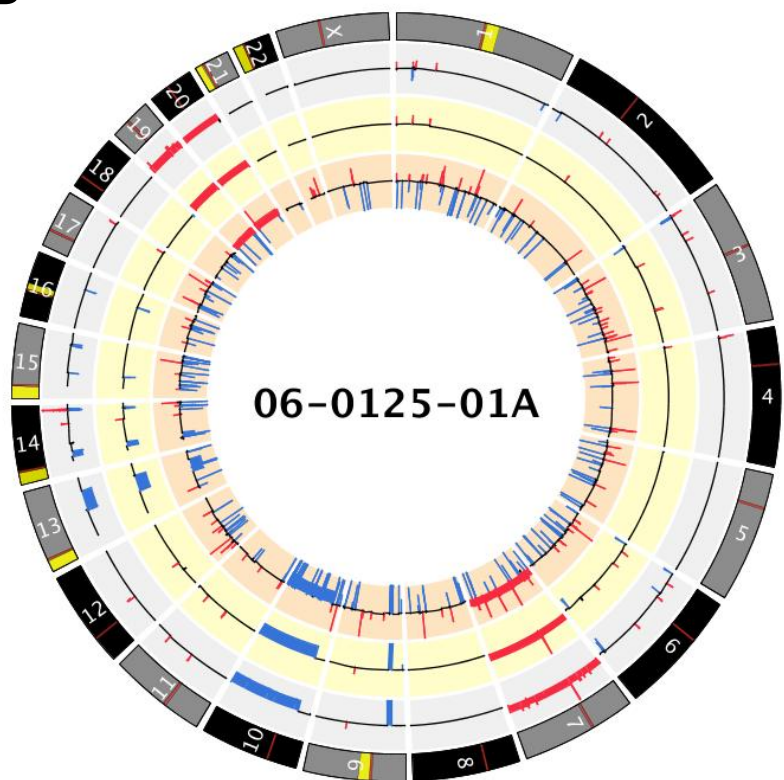

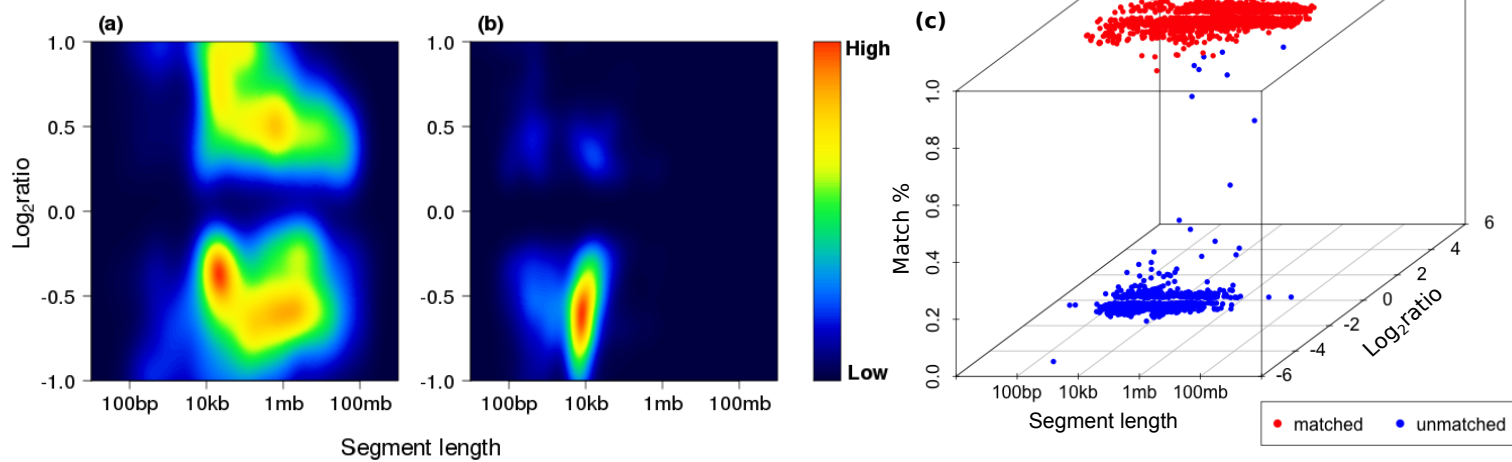

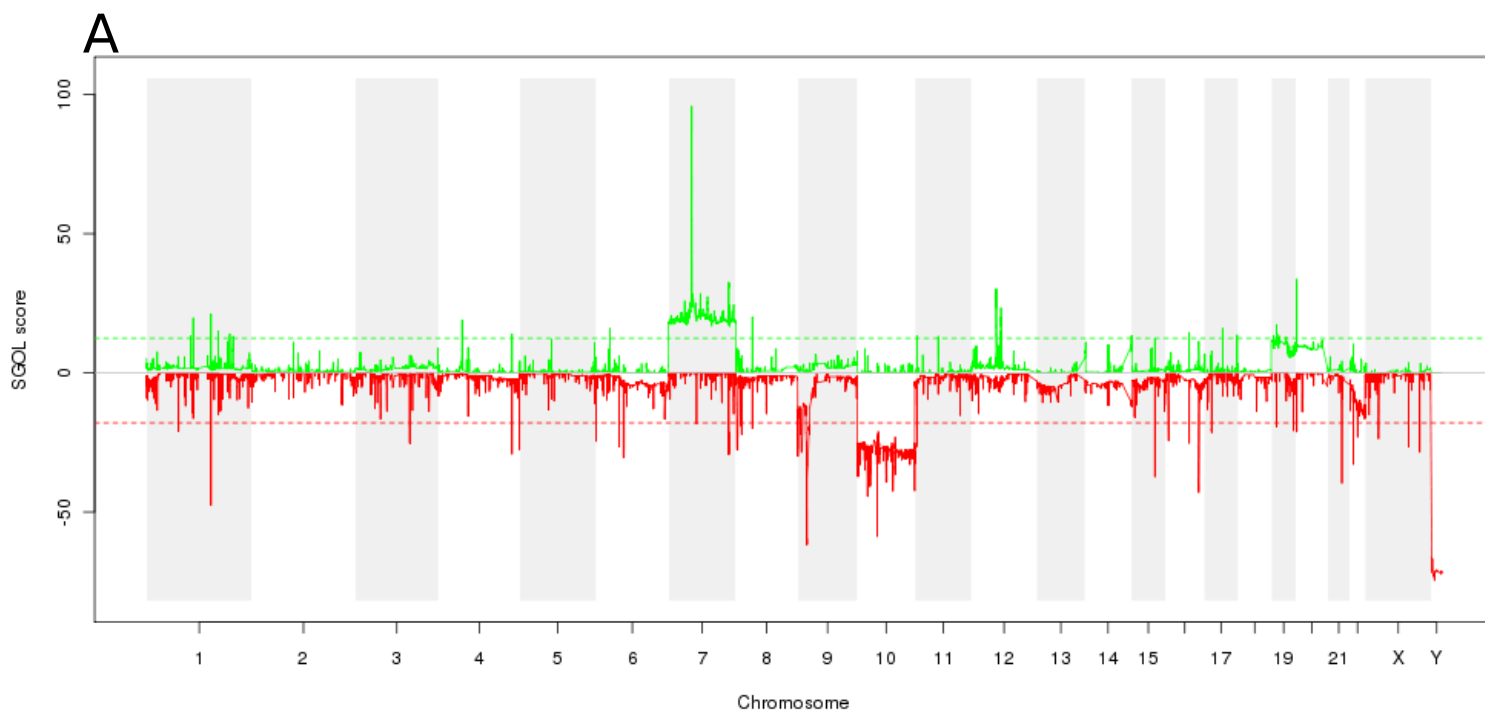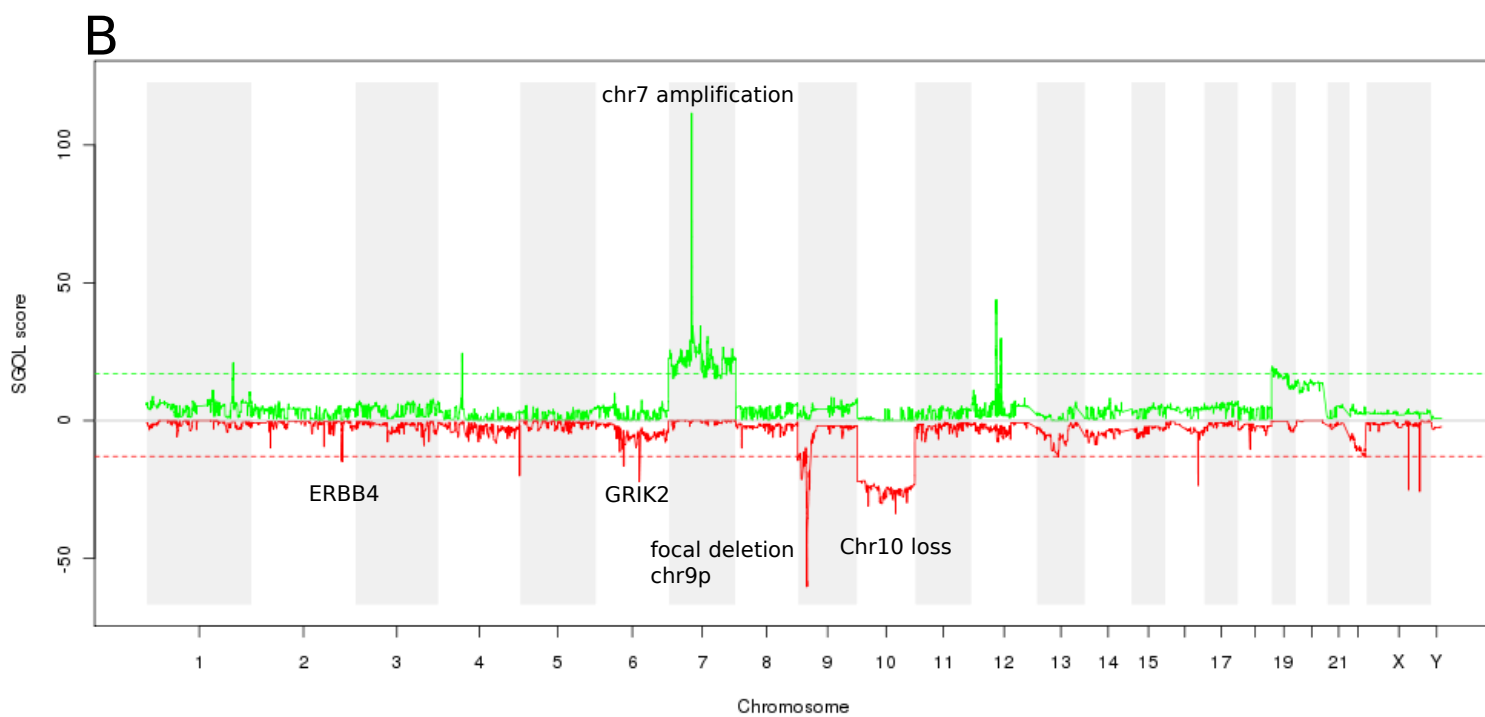



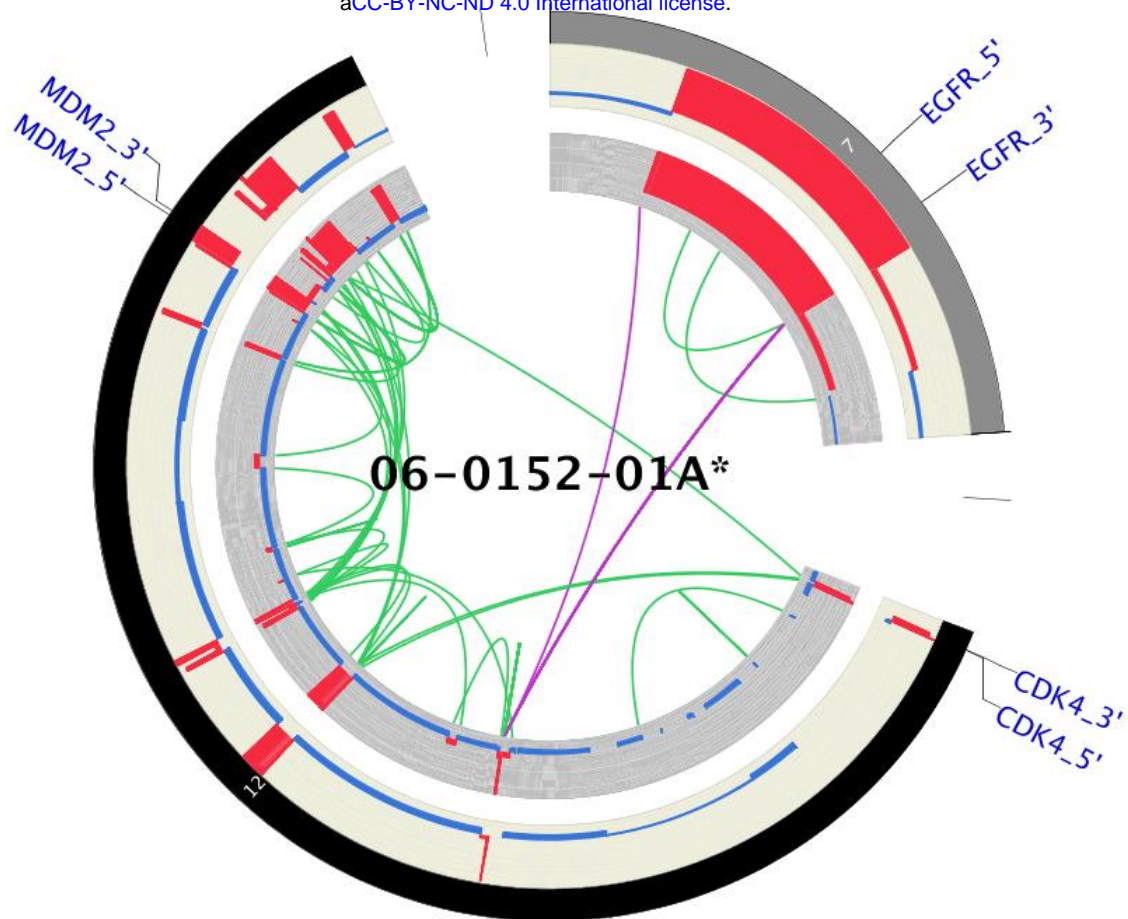



**A**

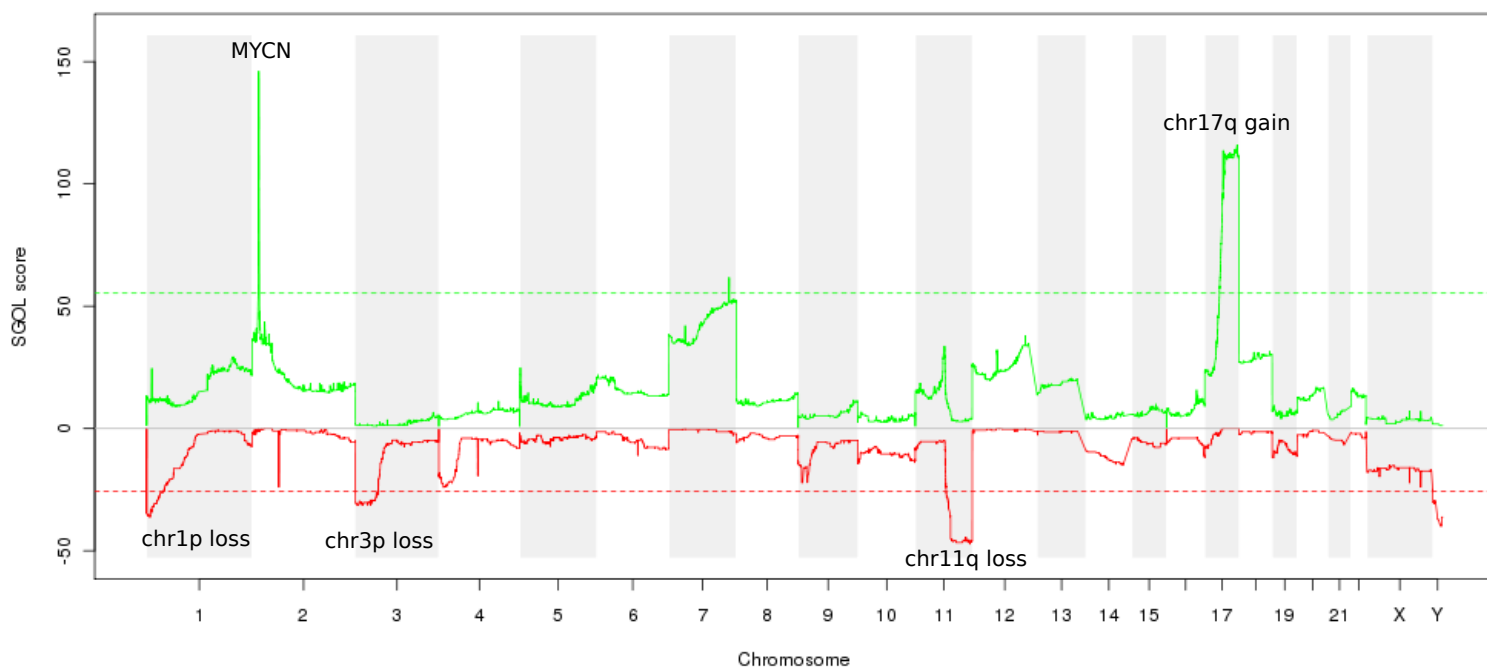

**B**

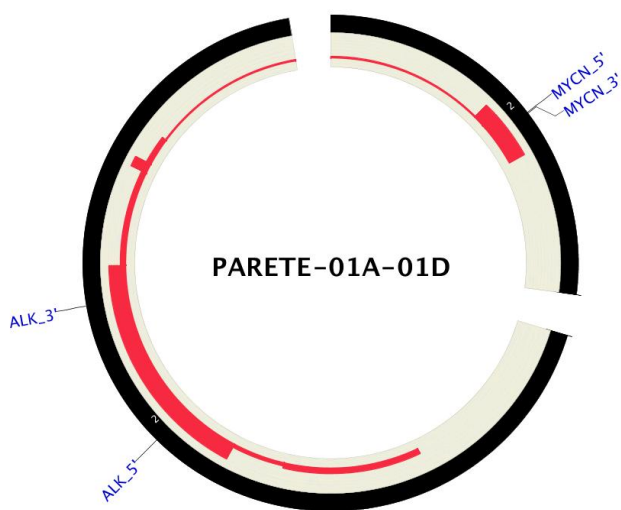

Source: http://biorxiv.org/content/10.1101/131235v1.full.pdf
